# Supplementary material for: Connexin 43 is an independent predictor of patient outcome in breast cancer patients
Source: PubMed Central journal article supplement (PMC6418069; doi:10.1007/s10549-018-5063-9), 2018-11-24
Supplement: 10549_2018_5063_MOESM1_ESM.pdf [file 10549_2018_5063_MOESM1_ESM.pdf]

**Supplementary table 1: Clinicopathological variables of whole database and Cx43 analysed samples** A TMA series of 1,980 breast cancer patients was immunoprobed for Cx43 expression. From the original series 1118 (56%) had sufficient cores for scoring to be performed.

| Clinicopathological variables | Whole database | Cx43 analysed samples |
|-------------------------------|----------------|-----------------------|
| <b>Age diagnosis</b>          |                |                       |
| <=50                          | 667 (34.4%)    | 398 (35.6%)           |
| >50                           | 1274 (65.6%)   | 717 (64.1%)           |
| <b>Tumor size</b>             |                |                       |
| <=2.0 cm                      | 1010 (52%)     | 534 (48%)             |
| > 2.0 cm                      | 931 (48%)      | 581 (52%)             |
| <b>Grade</b>                  |                |                       |
| 1                             | 440 (19.9%)    | 177 (15.8%)           |
| 2                             | 757 (34.2%)    | 376 (33.6%)           |
| 3                             | 1017 (45.9%)   | 562 (50.3%)           |
| <b>Tumor type</b>             |                |                       |
| Ductal                        | 1559 (80.3%)   | 941 (84.2%)           |
| Lobular                       | 215 (11.1%)    | 95 (8.5%)             |
| Medullary-like                | 44 (2.3%)      | 23 (2.1%)             |
| Miscellaneous                 | 10 (0.5%)      | 5 (0.4%)              |
| Special type                  | 113 (5.8%)     | 51 (4.6%)             |
| <b>Vascular invasion</b>      |                |                       |
| Absent                        | 1326 (68.8%)   | 722 (64.6%)           |
| Present                       | 602 (45.4%)    | 388 (34.7%)           |
| <b>Nodal stage</b>            |                |                       |
| 1                             | 1501 (66%)     | 659 (58.9%)           |
| 2                             | 595 (26.2%)    | 366 (32.7%)           |
| 3                             | 177 (7.8%)     | 90 (8.1%)             |
| <b>NPI</b>                    |                |                       |
| Good                          | 645 (33.2%)    | 324 (29%)             |
| Moderate                      | 997 (51.4%)    | 597 (53.6%)           |
| Poor                          | 299 (15.4%)    | 194 (17.4%)           |
| <b>ER-status</b>              |                |                       |

|                        |              |             |
|------------------------|--------------|-------------|
| Negative               | 547 (25.6%)  | 285 (25.8%) |
| Positive               | 1592 (64.1%) | 819 (74.2%) |
| <b>PgR-status</b>      |              |             |
| Negative               | 762 (40.7%)  | 446 (41.6%) |
| Positive               | 1111 (59.3%) | 626 (58.4%) |
| <b>HER2 status</b>     |              |             |
| Negative               | 1648 (87.8%) | 930 (87.3%) |
| Positive               | 230 (12.2%)  | 135 (12.7%) |
| <b>Triple negative</b> |              |             |
| Non-triple             | 1710 (84.2%) | 884 (81.6%) |
| Triple negative        | 322 (15.8%)  | 199 (18.4%) |
| <b>Basal phenotype</b> |              |             |
| Negative               | 1405 (74.7%) | 810 (74.2%) |
| Positive               | 475 (25.3%)  | 281 (25.8%) |
